# Supplementary material for: Plastome Diversity and Phylogenomic Relationships in Asteraceae
Source: Preprints.org preprint supplement (doi:10.20944/preprints202111.0167.v1), 2021-11-09
Supplement: Supplementary file 1 [file supplementary]

## Sheet: Achillea_millefolium
Specifications
==============
Sequence source file: "Achillea_millefolium.fasta"
Definement of microsatellites (unit size / minimum number of repeats):
(1/8) (2/4) (3/4) (4/3) (5/3) (6/3)
Maximal number of bases interrupting 2 SSRs in a compound microsatellite: 100
RESULTS OF MICROSATELLITE SEARCH
================================
Total number of sequences examined: 1
Total size of examined sequences (bp): 149113
Total number of identified SSRs: 131
Number of SSR containing sequences: 1
Number of sequences containing more than 1 SSR: 1
Number of SSRs present in compound formation: 23
Distribution to different repeat type classes
---------------------------------------------
Unit size	Number of SSRs
1	74
2	43
3	3
4	11
Frequency of identified SSR motifs
----------------------------------
Repeats	3	4	5	6	7	8	9	10	11	total
A	-	-	-	-	-	24	4	4		32
C	-	-	-	-	-		1			1
G	-	-	-	-	-	1				1
T	-	-	-	-	-	20	13	4	3	40
AG	-	4								4
AT	-	14	3							17
CT	-	2								2
GA	-	4								4
TA	-	7	3							10
TC	-	5								5
TG	-	1								1
ATT	-	1								1
TTC	-	1	1							2
AAAT	1									1
AATA	2									2
AATC	1									1
ATTG	1									1
ATTT	1									1
CAAT	1									1
TAAT	1									1
TATT	2									2
TTTC		1								1
Frequency of classified repeat types (considering sequence complementary)
-------------------------------------------------------------------------
Repeats	3	4	5	6	7	8	9	10	11	total
A/T	-	-	-	-	-	44	17	8	3	72
C/G	-	-	-	-	-	1	1			2
AC/GT	-	1								1
AG/CT	-	15								15
AT/AT	-	21	6							27
AAG/CTT	-	1	1							2
AAT/ATT	-	1								1
AAAG/CTTT		1								1
AAAT/ATTT	6									6
AATC/ATTG	3									3
AATT/AATT	1									1

## Sheet: Acilepis_saligna
Specifications
==============
Sequence source file: "Acilepis_saligna.fasta"
Definement of microsatellites (unit size / minimum number of repeats):
(1/8) (2/4) (3/4) (4/3) (5/3) (6/3)
Maximal number of bases interrupting 2 SSRs in a compound microsatellite: 100
RESULTS OF MICROSATELLITE SEARCH
================================
Total number of sequences examined: 1
Total size of examined sequences (bp): 152918
Total number of identified SSRs: 162
Number of SSR containing sequences: 1
Number of sequences containing more than 1 SSR: 1
Number of SSRs present in compound formation: 31
Distribution to different repeat type classes
---------------------------------------------
Unit size	Number of SSRs
1	117
2	38
3	4
4	3
Frequency of identified SSR motifs
----------------------------------
Repeats	3	4	5	6	7	8	9	10	11	12	13	14	15	16	total
A	-	-	-	-	-	23	9	12	5	2		1			52
C	-	-	-	-	-	2				1					3
T	-	-	-	-	-	27	13	11	3	5	2			1	62
AC	-	1													1
AG	-	3													3
AT	-	7	1	1											9
CT	-	4													4
GA	-	5													5
TA	-	7	3												10
TC	-	5													5
TG	-	1													1
ATG	-	1													1
TCT	-	1													1
TTA	-	1													1
TTC	-	1													1
AATC	1														1
TATT	1														1
TTTC	1														1
Frequency of classified repeat types (considering sequence complementary)
-------------------------------------------------------------------------
Repeats	3	4	5	6	7	8	9	10	11	12	13	14	15	16	total
A/T	-	-	-	-	-	50	22	23	8	7	2	1		1	114
C/G	-	-	-	-	-	2				1					3
AC/GT	-	2													2
AG/CT	-	17													17
AT/AT	-	14	4	1											19
AAG/CTT	-	2													2
AAT/ATT	-	1													1
ATC/ATG	-	1													1
AAAG/CTTT	1														1
AAAT/ATTT	1														1
AATC/ATTG	1														1

## Sheet: Ageratum_houstonianum
Specifications
==============
Sequence source file: "Ageratum_houstonianum.fasta"
Definement of microsatellites (unit size / minimum number of repeats):
(1/8) (2/4) (3/4) (4/3) (5/3) (6/3)
Maximal number of bases interrupting 2 SSRs in a compound microsatellite: 100
RESULTS OF MICROSATELLITE SEARCH
================================
Total number of sequences examined: 1
Total size of examined sequences (bp): 151541
Total number of identified SSRs: 172
Number of SSR containing sequences: 1
Number of sequences containing more than 1 SSR: 1
Number of SSRs present in compound formation: 35
Distribution to different repeat type classes
---------------------------------------------
Unit size	Number of SSRs
1	119
2	39
3	5
4	7
5	2
Frequency of identified SSR motifs
----------------------------------
Repeats	3	4	5	6	7	8	9	10	11	12	13	14	15	16	17	18	19	20	21	22	23	24	25	26	27	total
A	-	-	-	-	-	23	16	5	2	3	1	1	2													53
C	-	-	-	-	-	1	1																			2
T	-	-	-	-	-	31	18	4	3	1	3	1			1				1						1	64
AG	-	5																								5
AT	-	9	1					1																		11
CT	-	2																								2
GA	-	5																								5
TA	-	6	3																							9
TC	-	7																								7
ATA	-	1																								1
TAT	-		1																							1
TTA	-	1																								1
TTC	-	1		1																						2
AATA	1																									1
ATAA	1																									1
ATCA	1																									1
ATTG	1																									1
GATA	1																									1
TATT	1																									1
TTCT	1																									1
ATTTT	1																									1
GAAAT	1																									1
Frequency of classified repeat types (considering sequence complementary)
-------------------------------------------------------------------------
Repeats	3	4	5	6	7	8	9	10	11	12	13	14	15	16	17	18	19	20	21	22	23	24	25	26	27	total
A/T	-	-	-	-	-	54	34	9	5	4	4	2	2		1				1						1	117
C/G	-	-	-	-	-	1	1																			2
AG/CT	-	19																								19
AT/AT	-	15	4					1																		20
AAG/CTT	-	1		1																						2
AAT/ATT	-	2	1																							3
AAAG/CTTT	1																									1
AAAT/ATTT	3																									3
AATC/ATTG	2																									2
AGAT/ATCT	1																									1
AAAAT/ATTTT	1																									1
AAATG/ATTTC	1																									1

## Sheet: Anacyclus_radiatus
Specifications
==============
Sequence source file: "Anacyclus_radiatus.fasta"
Definement of microsatellites (unit size / minimum number of repeats):
(1/8) (2/4) (3/4) (4/3) (5/3) (6/3)
Maximal number of bases interrupting 2 SSRs in a compound microsatellite: 100
RESULTS OF MICROSATELLITE SEARCH
================================
Total number of sequences examined: 1
Total size of examined sequences (bp): 149866
Total number of identified SSRs: 178
Number of SSR containing sequences: 1
Number of sequences containing more than 1 SSR: 1
Number of SSRs present in compound formation: 41
Distribution to different repeat type classes
---------------------------------------------
Unit size	Number of SSRs
1	114
2	50
3	4
4	9
5	1
Frequency of identified SSR motifs
----------------------------------
Repeats	3	4	5	6	7	8	9	10	11	total
A	-	-	-	-	-	18	22	11	2	53
G	-	-	-	-	-	2				2
T	-	-	-	-	-	22	24	10	3	59
AG	-	4								4
AT	-	13	4		1					18
CA	-		1							1
CT	-	2								2
GA	-	4								4
GT	-		1							1
TA	-	9	4							13
TC	-	5								5
TG	-	1	1							2
ATA	-	1								1
ATT	-	1								1
TTC	-	1	1							2
AATA	1									1
AATC	1									1
AATT	1									1
ATTG	1									1
ATTT	1									1
CAAT	1									1
TAAT	1									1
TATT	1									1
TTTC		1								1
AAATT	1									1
Frequency of classified repeat types (considering sequence complementary)
-------------------------------------------------------------------------
Repeats	3	4	5	6	7	8	9	10	11	total
A/T	-	-	-	-	-	40	46	21	5	112
C/G	-	-	-	-	-	2				2
AC/GT	-	1	3							4
AG/CT	-	15								15
AT/AT	-	22	8		1					31
AAG/CTT	-	1	1							2
AAT/ATT	-	2								2
AAAG/CTTT		1								1
AAAT/ATTT	3									3
AATC/ATTG	3									3
AATT/AATT	2									2
AAATT/AATTT	1									1

## Sheet: Archjdasyphyllum_excelsum
Specifications
==============
Sequence source file: "Archidasyphyllum_excelsum.fasta"
Definement of microsatellites (unit size / minimum number of repeats):
(1/8) (2/4) (3/4) (4/3) (5/3) (6/3)
Maximal number of bases interrupting 2 SSRs in a compound microsatellite: 100
RESULTS OF MICROSATELLITE SEARCH
================================
Total number of sequences examined: 1
Total size of examined sequences (bp): 151880
Total number of identified SSRs: 174
Number of SSR containing sequences: 1
Number of sequences containing more than 1 SSR: 1
Number of SSRs present in compound formation: 31
Distribution to different repeat type classes
---------------------------------------------
Unit size	Number of SSRs
1	121
2	44
3	4
4	4
5	1
Frequency of identified SSR motifs
----------------------------------
Repeats	3	4	5	6	7	8	9	10	11	12	13	14	15	16	17	18	19	20	21	22	23	24	25	total
A	-	-	-	-	-	17	8	3	1	2	3	1	6	1		2		1						45
C	-	-	-	-	-	2																		2
G	-	-	-	-	-	1		1																2
T	-	-	-	-	-	29	21	7	4	1	2	4	1	1		1							1	72
AG	-	5																						5
AT	-	9	1																					10
CG	-	1																						1
CT	-	2																						2
GA	-	3																						3
GT	-	1																						1
TA	-	10	2	2																				14
TC	-	8																						8
AAT	-	1																						1
TAT	-	1																						1
TTC	-	2																						2
AGAA	1																							1
ATAA	1																							1
TATT	1																							1
TTTC	1																							1
TTTAG	1																							1
Frequency of classified repeat types (considering sequence complementary)
-------------------------------------------------------------------------
Repeats	3	4	5	6	7	8	9	10	11	12	13	14	15	16	17	18	19	20	21	22	23	24	25	total
A/T	-	-	-	-	-	46	29	10	5	3	5	5	7	2		3		1					1	117
C/G	-	-	-	-	-	3		1																4
AC/GT	-	1																						1
AG/CT	-	18																						18
AT/AT	-	19	3	2																				24
CG/CG	-	1																						1
AAG/CTT	-	2																						2
AAT/ATT	-	2																						2
AAAG/CTTT	2																							2
AAAT/ATTT	2																							2
AAACT/AGTTT	1																							1

## Sheet: Argyranthemum_foeniculaceum
Specifications
==============
Sequence source file: "Argyranthemum_foeniculaceum.fasta"
Definement of microsatellites (unit size / minimum number of repeats):
(1/8) (2/4) (3/4) (4/3) (5/3) (6/3)
Maximal number of bases interrupting 2 SSRs in a compound microsatellite: 100
RESULTS OF MICROSATELLITE SEARCH
================================
Total number of sequences examined: 1
Total size of examined sequences (bp): 149841
Total number of identified SSRs: 124
Number of SSR containing sequences: 1
Number of sequences containing more than 1 SSR: 1
Number of SSRs present in compound formation: 14
Distribution to different repeat type classes
---------------------------------------------
Unit size	Number of SSRs
1	66
2	43
3	4
4	11
Frequency of identified SSR motifs
----------------------------------
Repeats	3	4	5	6	7	8	9	10	11	12	13	total
A	-	-	-	-	-	24	8		1			33
G	-	-	-	-	-	2						2
T	-	-	-	-	-	19	9	1		1	1	31
AG	-	4										4
AT	-	14	1	1								16
CT	-	2										2
GA	-	3										3
TA	-	8	1	3	1							13
TC	-	4										4
TG	-	1										1
ATA	-	1										1
ATT	-	1										1
TTC	-	1	1									2
AATA	1											1
AATC	1											1
ATAC	1											1
ATTG	1											1
CAAT	1											1
TAAA	1											1
TAAT	1											1
TAGA	1											1
TATT	2											2
TTTC		1										1
Frequency of classified repeat types (considering sequence complementary)
-------------------------------------------------------------------------
Repeats	3	4	5	6	7	8	9	10	11	12	13	total
A/T	-	-	-	-	-	43	17	1	1	1	1	64
C/G	-	-	-	-	-	2						2
AC/GT	-	1										1
AG/CT	-	13										13
AT/AT	-	22	2	4	1							29
AAG/CTT	-	1	1									2
AAT/ATT	-	2										2
AAAG/CTTT		1										1
AAAT/ATTT	4											4
AATC/ATTG	3											3
AATT/AATT	1											1
ACAT/ATGT	1											1
AGAT/ATCT	1											1

## Sheet: Arnica_montana
Specifications
==============
Sequence source file: "Arnica_montana.fasta"
Definement of microsatellites (unit size / minimum number of repeats):
(1/8) (2/4) (3/4) (4/3) (5/3) (6/3)
Maximal number of bases interrupting 2 SSRs in a compound microsatellite: 100
RESULTS OF MICROSATELLITE SEARCH
================================
Total number of sequences examined: 1
Total size of examined sequences (bp): 151998
Total number of identified SSRs: 142
Number of SSR containing sequences: 1
Number of sequences containing more than 1 SSR: 1
Number of SSRs present in compound formation: 18
Distribution to different repeat type classes
---------------------------------------------
Unit size	Number of SSRs
1	95
2	38
3	2
4	6
6	1
Frequency of identified SSR motifs
----------------------------------
Repeats	3	4	5	6	7	8	9	10	11	12	13	14	15	total
A	-	-	-	-	-	27	11	3		1				42
C	-	-	-	-	-	1								1
T	-	-	-	-	-	27	12	6	4		1	1	1	52
AG	-	5												5
AT	-	6	1	1										8
CT	-	2												2
GA	-	5												5
TA	-	6	4	1										11
TC	-	7												7
TTC	-	1	1											2
AATA	1													1
ATTT	1													1
GATA	1													1
TATT	1													1
TTTC	2													2
GGATAA	1													1
Frequency of classified repeat types (considering sequence complementary)
-------------------------------------------------------------------------
Repeats	3	4	5	6	7	8	9	10	11	12	13	14	15	total
A/T	-	-	-	-	-	54	23	9	4	1	1	1	1	94
C/G	-	-	-	-	-	1								1
AG/CT	-	19												19
AT/AT	-	12	5	2										19
AAG/CTT	-	1	1											2
AAAG/CTTT	2													2
AAAT/ATTT	3													3
AGAT/ATCT	1													1
AAGGAT/ATCCTT	1													1

## Sheet: Artemisia_tridentata
Specifications
==============
Sequence source file: "Artemisia_tridentata.fasta"
Definement of microsatellites (unit size / minimum number of repeats):
(1/8) (2/4) (3/4) (4/3) (5/3) (6/3)
Maximal number of bases interrupting 2 SSRs in a compound microsatellite: 100
RESULTS OF MICROSATELLITE SEARCH
================================
Total number of sequences examined: 1
Total size of examined sequences (bp): 151143
Total number of identified SSRs: 195
Number of SSR containing sequences: 1
Number of sequences containing more than 1 SSR: 1
Number of SSRs present in compound formation: 44
Distribution to different repeat type classes
---------------------------------------------
Unit size	Number of SSRs
1	127
2	49
3	5
4	13
5	1
Frequency of identified SSR motifs
----------------------------------
Repeats	3	4	5	6	7	8	9	10	11	12	13	14	15	16	17	18	19	20	21	22	23	24	25	26	27	28	29	30	31	32	33	34	35	36	37	38	39	40	41	total
A	-	-	-	-	-	23	13	8	6	2			1	1	1																									55
C	-	-	-	-	-				1																															1
G	-	-	-	-	-	1																																		1
T	-	-	-	-	-	27	18	8	7	1	2	2	2	2																									1	70
AG	-	4																																						4
AT	-	13	2	2	2																																			19
CT	-	2																																						2
GA	-	4																																						4
TA	-	10	2									1																												13
TC	-	6																																						6
TG	-	1																																						1
ATA	-	1																																						1
ATT	-	1																																						1
TTA	-			1																																				1
TTC	-	1	1																																					2
AAAT	1																																							1
AATA	2																																							2
AATC	2																																							2
AATT	1																																							1
ATTG	1																																							1
ATTT	1																																							1
CAAT	1																																							1
TAAT	1																																							1
TATT	1																																							1
TTTA	1																																							1
TTTC		1																																						1
AAATT	1																																							1
Frequency of classified repeat types (considering sequence complementary)
-------------------------------------------------------------------------
Repeats	3	4	5	6	7	8	9	10	11	12	13	14	15	16	17	18	19	20	21	22	23	24	25	26	27	28	29	30	31	32	33	34	35	36	37	38	39	40	41	total
A/T	-	-	-	-	-	50	31	16	13	3	2	2	3	3	1																								1	125
C/G	-	-	-	-	-	1			1																															2
AC/GT	-	1																																						1
AG/CT	-	16																																						16
AT/AT	-	23	4	2	2							1																												32
AAG/CTT	-	1	1																																					2
AAT/ATT	-	2		1																																				3
AAAG/CTTT		1																																						1
AAAT/ATTT	6																																							6
AATC/ATTG	4																																							4
AATT/AATT	2																																							2
AAATT/AATTT	1																																							1

## Sheet: Aster_tataricus
Specifications
==============
Sequence source file: "Aster_tataricus.fasta"
Definement of microsatellites (unit size / minimum number of repeats):
(1/8) (2/4) (3/4) (4/3) (5/3) (6/3)
Maximal number of bases interrupting 2 SSRs in a compound microsatellite: 100
RESULTS OF MICROSATELLITE SEARCH
================================
Total number of sequences examined: 1
Total size of examined sequences (bp): 152992
Total number of identified SSRs: 234
Number of SSR containing sequences: 1
Number of sequences containing more than 1 SSR: 1
Number of SSRs present in compound formation: 75
Distribution to different repeat type classes
---------------------------------------------
Unit size	Number of SSRs
1	130
2	57
3	23
4	15
5	8
6	1
Frequency of identified SSR motifs
----------------------------------
Repeats	3	4	5	6	7	8	9	10	11	12	13	14	15	16	17	18	total
A	-	-	-	-	-	33	7	14	1					1		1	57
C	-	-	-	-	-	2	2										4
G	-	-	-	-	-	1											1
T	-	-	-	-	-	28	21	12	3	1		2			1		68
AC	-	1															1
AG	-	4															4
AT	-	9	9														18
CT	-	3															3
GA	-	5															5
TA	-	10	3	1	3	1											18
TC	-	7															7
TG	-	1															1
AAT	-	2	2														4
ATA	-	2		1													3
ATT	-	3															3
TAA	-	2	1														3
TAT	-	4															4
TCT	-	1															1
TTA	-		3														3
TTC	-	1	1														2
AAAT	2																2
AAGA	1																1
AATA	3																3
ATAA	1																1
ATAG	1																1
ATTA		1															1
CAAT	1																1
TATC	1																1
TATT	1																1
TTAA	1																1
TTCT	1																1
TTTA	1																1
AATTA	1																1
ATTAG	1																1
TAAGA	1																1
TAATA	1																1
TATTA	2																2
TCCTA	1																1
TTTGA	1																1
CTTATA	1																1
Frequency of classified repeat types (considering sequence complementary)
-------------------------------------------------------------------------
Repeats	3	4	5	6	7	8	9	10	11	12	13	14	15	16	17	18	total
A/T	-	-	-	-	-	61	28	26	4	1		2		1	1	1	125
C/G	-	-	-	-	-	3	2										5
AC/GT	-	2															2
AG/CT	-	19															19
AT/AT	-	19	12	1	3	1											36
AAG/CTT	-	2	1														3
AAT/ATT	-	13	6	1													20
AAAG/CTTT	2																2
AAAT/ATTT	8																8
AATC/ATTG	1																1
AATT/AATT	1	1															2
AGAT/ATCT	2																2
AAATC/ATTTG	1																1
AAATT/AATTT	1																1
AAGAT/ATCTT	1																1
AATAT/ATATT	3																3
AATCT/AGATT	1																1
AGGAT/ATCCT	1																1
AAGTAT/ACTTAT	1																1

## Sheet: Bahia_ambrosioides
Specifications
==============
Sequence source file: "Bahia_ambrosioides.fasta"
Definement of microsatellites (unit size / minimum number of repeats):
(1/8) (2/4) (3/4) (4/3) (5/3) (6/3)
Maximal number of bases interrupting 2 SSRs in a compound microsatellite: 100
RESULTS OF MICROSATELLITE SEARCH
================================
Total number of sequences examined: 1
Total size of examined sequences (bp): 151377
Total number of identified SSRs: 156
Number of SSR containing sequences: 1
Number of sequences containing more than 1 SSR: 1
Number of SSRs present in compound formation: 23
Distribution to different repeat type classes
---------------------------------------------
Unit size	Number of SSRs
1	105
2	40
3	5
4	4
5	1
6	1
Frequency of identified SSR motifs
----------------------------------
Repeats	3	4	5	6	7	8	9	10	11	12	13	14	15	16	17	18	19	20	21	22	total
A	-	-	-	-	-	29	12	5	1											1	48
C	-	-	-	-	-	1			1												2
G	-	-	-	-	-		2														2
T	-	-	-	-	-	23	15	10	3			1								1	53
AG	-	5																			5
AT	-	5	1																		6
CT	-	2																			2
GA	-	5																			5
TA	-	8	4	2	1																15
TC	-	7																			7
AAT	-	1																			1
TAA	-	1	1																		2
TTC	-	2																			2
AATA	1																				1
GATA	1																				1
TATT	1																				1
TTTC	1																				1
TTTGA	1																				1
TGCATA	1																				1
Frequency of classified repeat types (considering sequence complementary)
-------------------------------------------------------------------------
Repeats	3	4	5	6	7	8	9	10	11	12	13	14	15	16	17	18	19	20	21	22	total
A/T	-	-	-	-	-	52	27	15	4			1								2	101
C/G	-	-	-	-	-	1	2		1												4
AG/CT	-	19																			19
AT/AT	-	13	5	2	1																21
AAG/CTT	-	2																			2
AAT/ATT	-	2	1																		3
AAAG/CTTT	1																				1
AAAT/ATTT	2																				2
AGAT/ATCT	1																				1
AAATC/ATTTG	1																				1
ATATGC/ATATGC	1																				1

[truncated: 27 more sheets: Bidens_subalternans, Calendula_arvensis, Carthamus_tinctorius, Centipeda_minima, Conyza_bonariensis, Coreopsis_gigantea, Doniophyton_anomalum, Eupatorium_cannabinum, Flaveriana_trinervia, Fulcaldea_stuessyii, Gerbera_hybrida, Helianthus_annuus, Helichrysum_splendidum, Lactuca_sativa, Melampodium_lineralilobum, Nastanthus_patagonicus, Phagnalon_saxatile, Pleurocarpaea_gracilis, Pterocaulon_sphaeranthoides, Santolina_chamaecyparissus …]
